# Supplementary material for: Prediction of SiS2 and SiSe2 as promising anode materials for sodium-ion batteries
Source: Royal Society of Chemistry journal article supplement (doi:10.1039/d2cp01184k), 2022-01-01
Supplement: d2cp01184k1.pdf [file d2cp01184k1.pdf]

## Supplementary Information

### Prediction of $\text{SiS}_2$ and $\text{SiSe}_2$ as the Promising Anode Materials for Sodium-ion Batteries

Xianpeng Wang,<sup>a</sup> Lu Wang<sup>\*a</sup> and Youyong Li<sup>\*ab</sup>

<sup>a</sup>*Institute of Functional Nano & Soft Materials (FUNSOM), Jiangsu Key Laboratory for Carbon-Based Functional Materials & Devices, Soochow University, Suzhou, Jiangsu 215123, China.*

<sup>b</sup>*Macao Institute of Materials Science and Engineering, Macau University of Science and Technology, Taipa 999078 Macau SAR, China.*

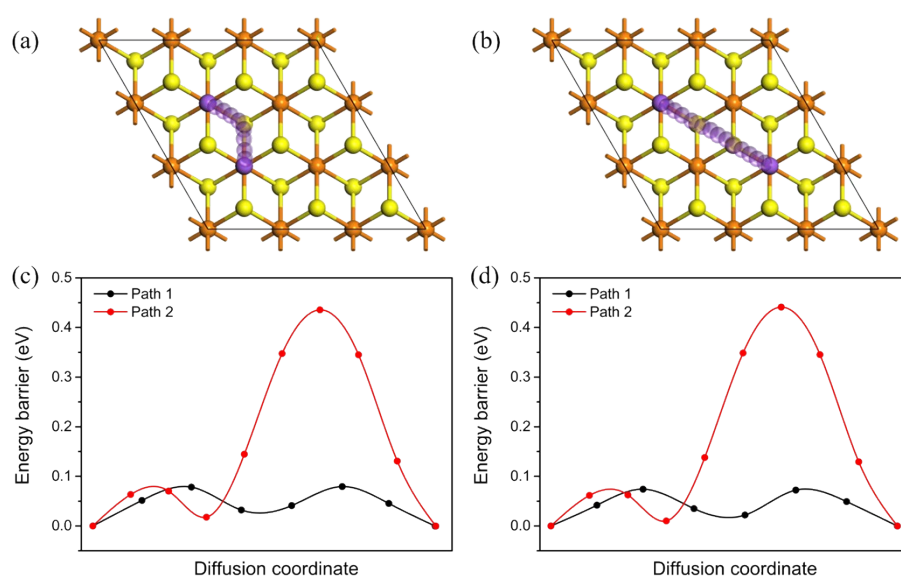

**Figure S1.** (a)-(b) Two possible Na diffusion paths on  $\text{SiX}_2$  surface, and the diffusion barriers for (c)  $\text{SiS}_2$  and (d)  $\text{SiSe}_2$ .

## The adsorption and diffusion of single Na ion on the $\text{Na}_1\text{SiSe}_2$ surface

We investigate the Na diffusion barrier on the first adsorbed Na layer by using the CI-NEB method, and plotted in Figure S2. Four adsorption sites (S1, S2, S3, H1) are considered on the  $\text{Na}_1\text{SiSe}_2$  surface (Figure S2a-b), and H1 is the most favorable adsorption site. There are two different diffusion paths for Na on the  $\text{Na}_1\text{SiSe}_2$  surface, namely, path 1 and path 2. As shown in Figure S2c, path 1 is the Na ion migrates from the most stable H1 site to the adjacent H1 site, passing through a metastable S1 site. Path 2 is the Na ion diffuses along the  $\text{H1} \rightarrow \text{S2} \rightarrow \text{S3} \rightarrow \text{H1}$  path.

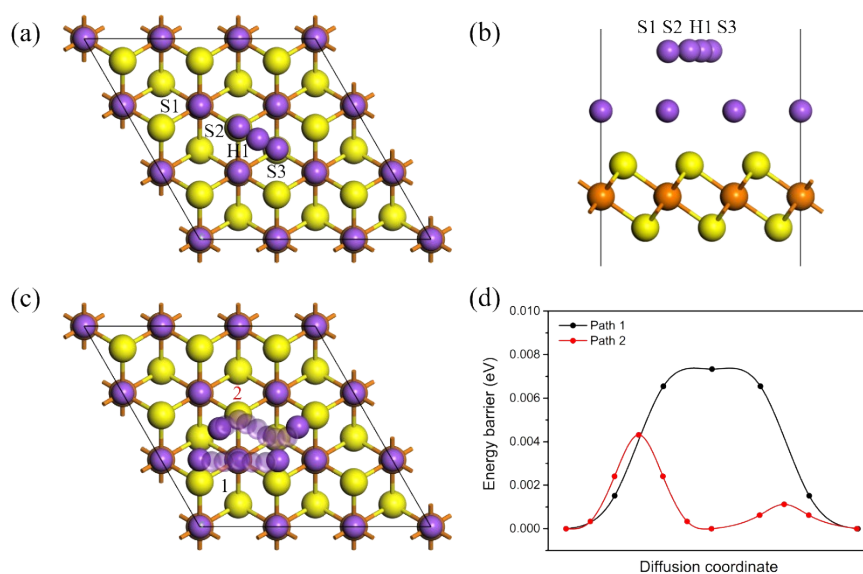

**Figure S2.** (a) Top view and (b) side view of  $\text{Na}_1\text{SiSe}_2$  with four possible adsorption sites denoted by S1, S2, S3, and S4; (c) two different diffusion paths of Na ion and (d) the corresponding diffusion barriers.
